# Supplementary material
Source: publisher site journal article supplement (https://www.dovepress.com/article/367940)

Supplementary Figure 1. Cochrane Risk of Bias Assessment for Included Studies. Cochrane risk of bias was performed for the included studies. Each study was scored by two authors.


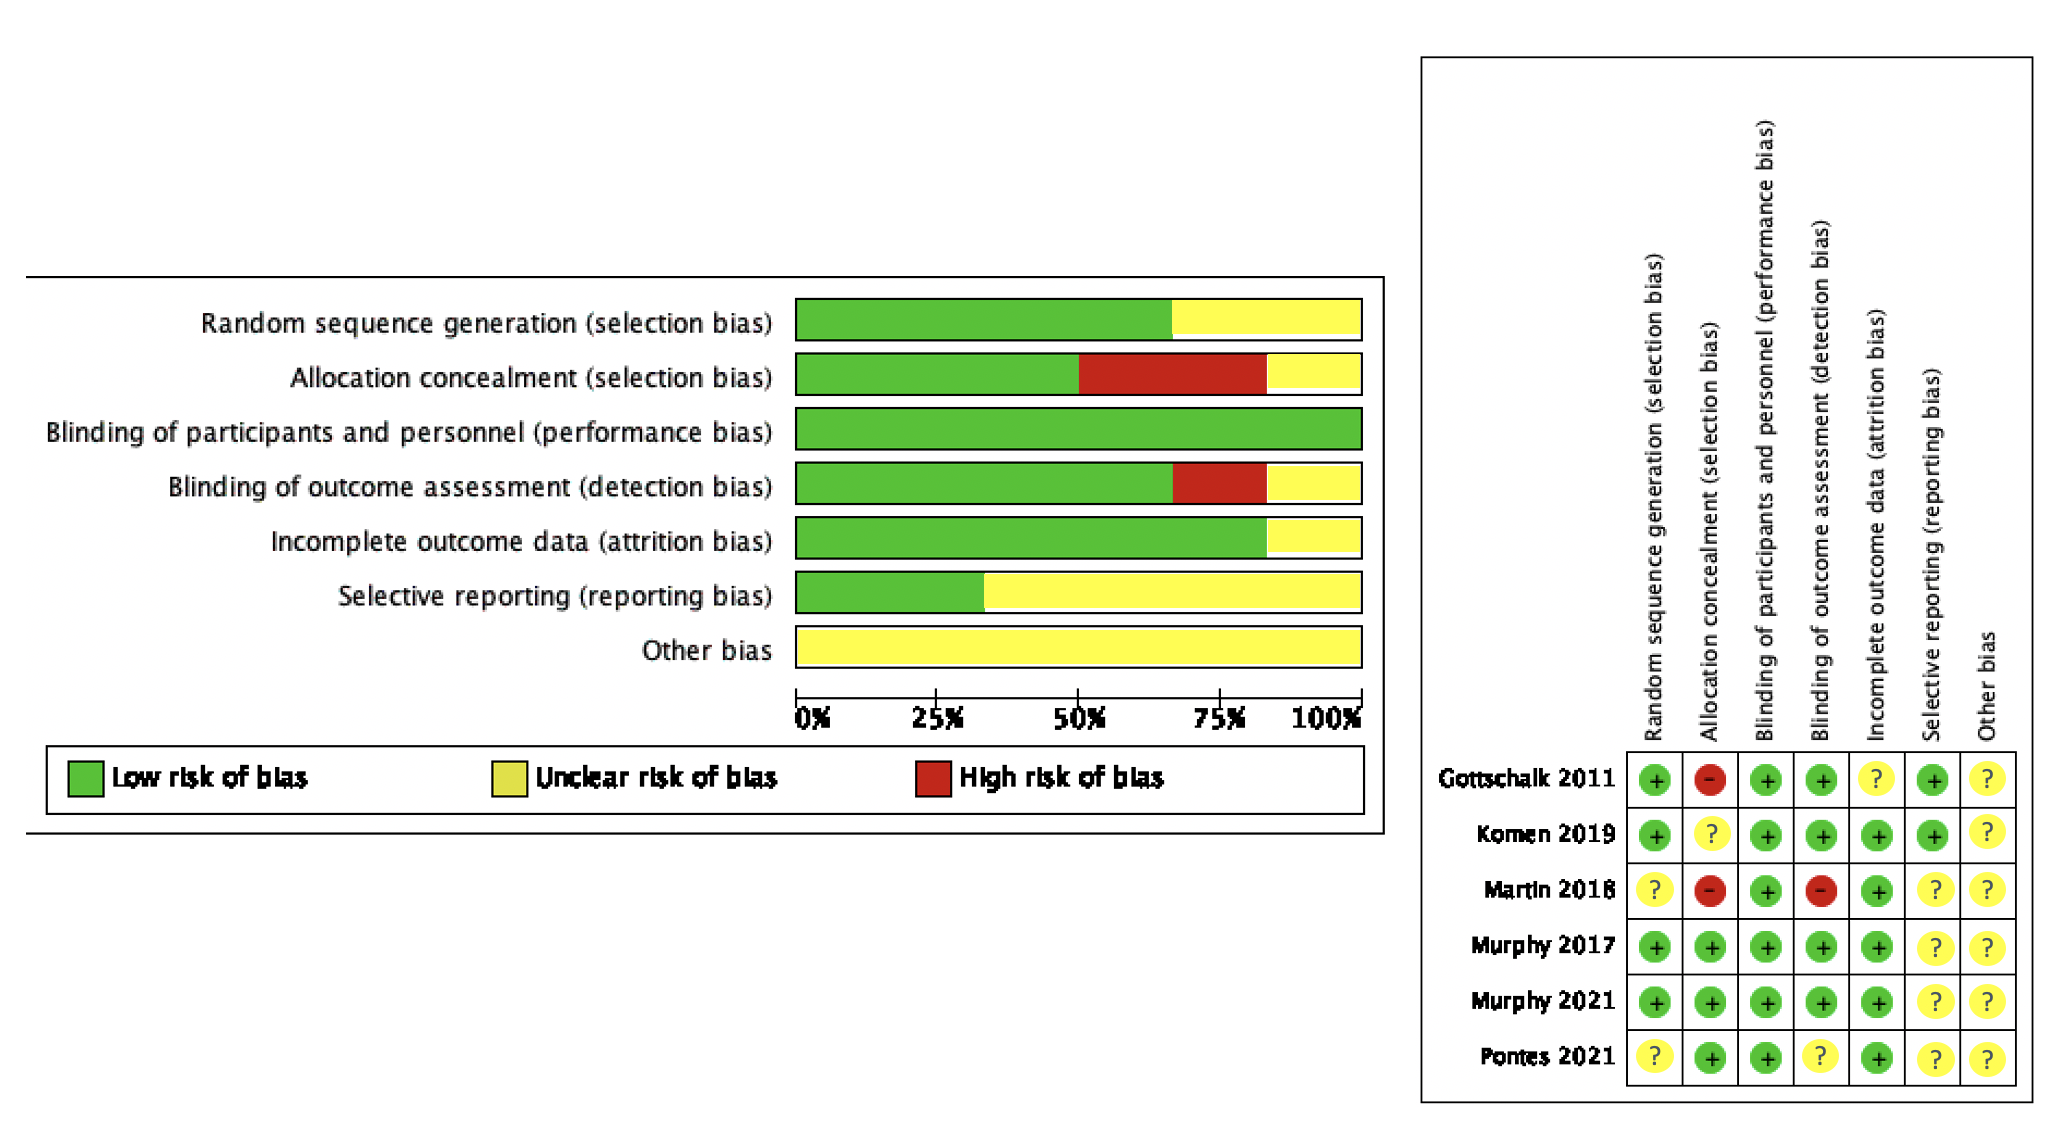

Supplement: Supplementary file 1 [file get_supplementary_file.php]
